# Supplementary material
Source: PubMed Central journal article supplement (PMC8167498)

# Supp figure 1

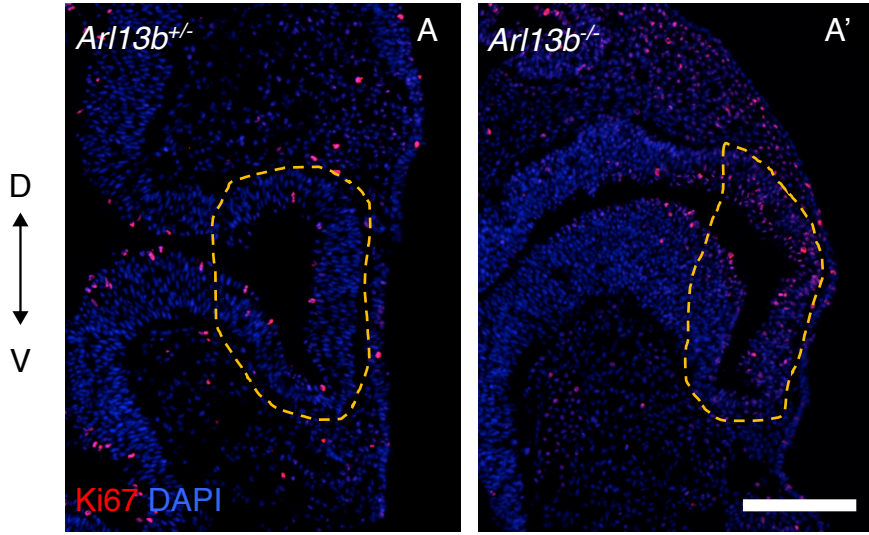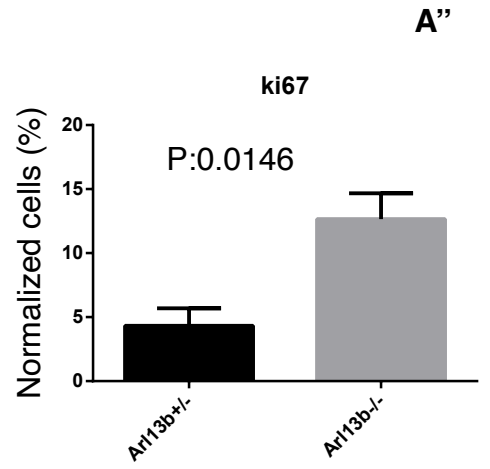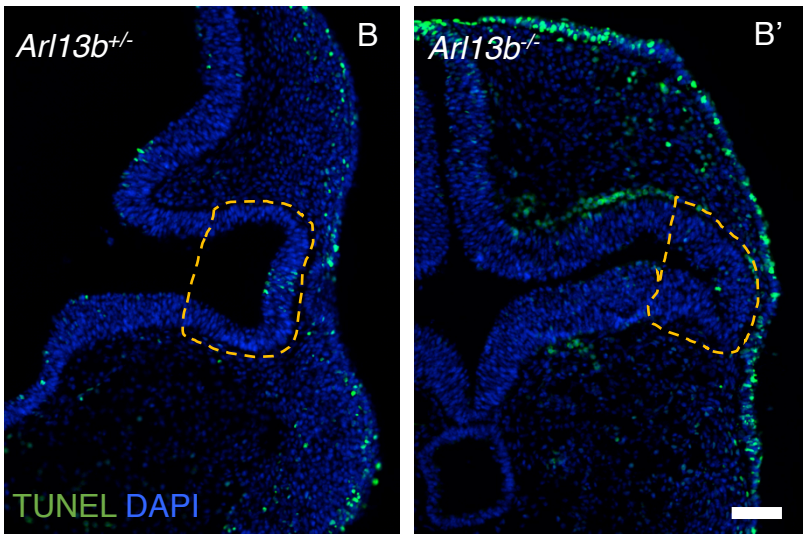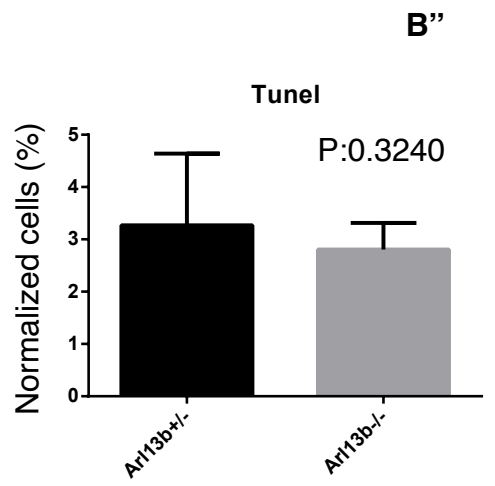

# Supp figure 2

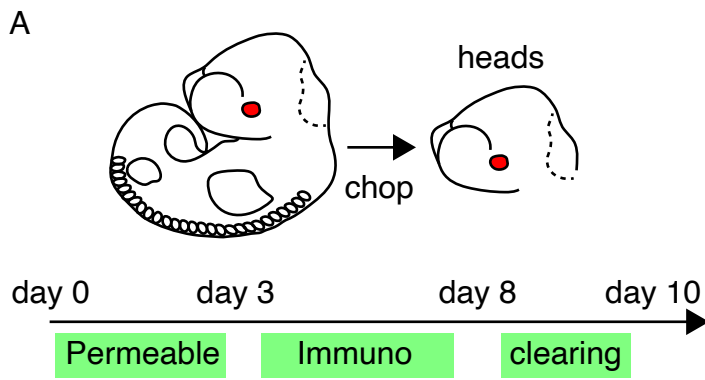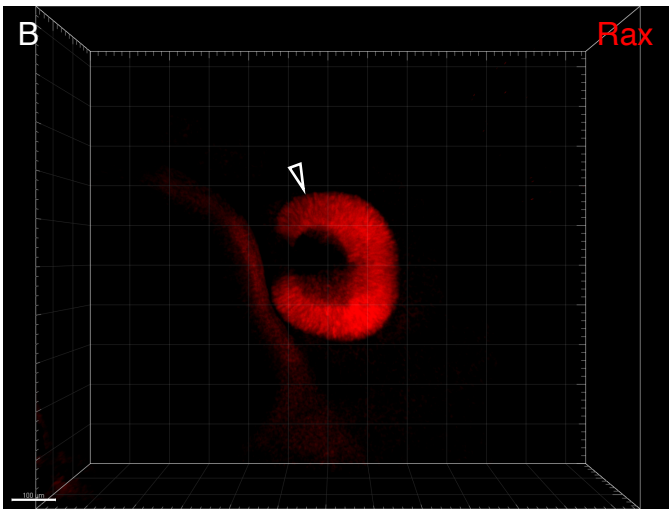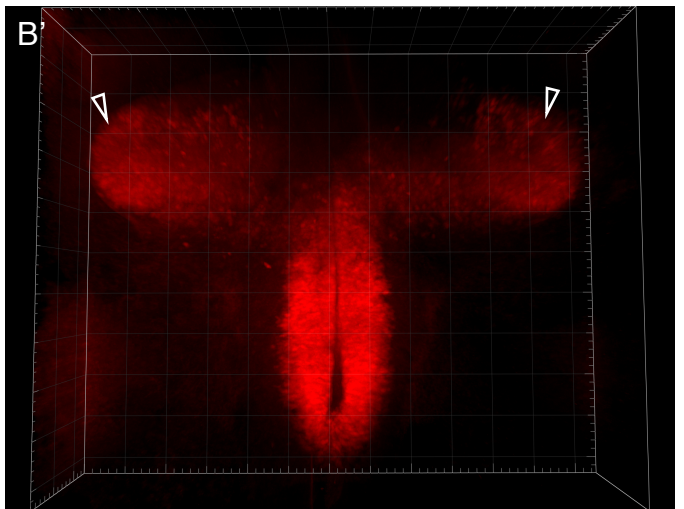

Supplement: NIHMS1702315-supplement-Supp_Fig_1_and_2.pdf [file NIHMS1702315-supplement-Supp_Fig_1_and_2.pdf]
